# Supplementary material for: Predictors of Efavirenz Plasma Exposure, Auto-Induction Profile, and Effect of Pharmacogenetic Variations among HIV-Infected Children in Ethiopia: A Prospective Cohort Study
Source: MDPI journal article supplement (doi:10.3390/jpm11121303), 2021-12-05
Supplement: s1 [file s1]

**Supplementary Table 1.** Effect of genotype on plasma efavirenz concentration at the 4<sup>th</sup>, 8<sup>th</sup>, 12<sup>th</sup>, 24<sup>th</sup> and 48<sup>th</sup> weeks of antiretroviral treatment among HIV infected children using one-way ANOVA.

| Genotype                                       |                   | n  | Week 4             |                   |          | Week 8             |                   |          | Week 12            |                   |          | Week 24            |                   |          | Week 48            |                   |          |
|------------------------------------------------|-------------------|----|--------------------|-------------------|----------|--------------------|-------------------|----------|--------------------|-------------------|----------|--------------------|-------------------|----------|--------------------|-------------------|----------|
|                                                |                   |    | Geometr<br>ic mean | Standard<br>Error | <i>p</i> |
| <b>CYP2B6*</b><br><b>6</b>                     | *1/*1             | 48 | 1.787              | 1.12              | < 0.001  | 2.265              | 1.13              | 0.002    | 1.760              | 1.15              | 0.002    | 1.663              | 1.13              | <0.001   | 2.196              | 1.13              | <0,001   |
|                                                | *1/*6             | 44 | 2.505              | 1.14              |          | 2.095              | 1.19              |          | 2.281              | 1.24              |          | 2.648              | 1.13              |          | 1.810              | 1.22              |          |
|                                                | *6/*6             | 9  | 6.183              | 1.28              |          | 8.193              | 1.43              |          | 8.715              | 1.64              |          | 11.219             | 1.52              |          | 8.361              | 1.22              |          |
| <b>CYP3A5</b>                                  | *1/*1             | 6  | 2.253              | 1.20              | 0.98     | 2.628              | 1.09              | 0.64     | 0.827              | 1.53              | 0.23     | 1.537              | 1.43              | 0.28     | 1.008              | 1.57              | 0.07     |
|                                                | *1/*3 or<br>*1/*6 | 34 | 2.308              | 1.24              |          | 2.322              | 1.27              |          | 2.129              | 1.39              |          | 3.048              | 1.29              |          | 3.754              | 1.22              |          |
|                                                | *3/*3 or<br>*3/*6 | 61 | 2.373              | 1.11              |          | 2.513              | 1.15              |          | 2.532              | 1.12              |          | 2.315              | 1.11              |          | 1.894              | 1.16              |          |
| <b>UGT2B7</b><br><b>rs372</b><br><b>G&gt;A</b> | A/A               | 17 | 2.336              | 1.21              | 0.38     | 2.398              | 1.39              | 0.59     | 3.237              | 1.33              | 0.43     | 2.416              | 1.42              | 0.91     | 2.970              | 1.30              | 0.45     |
|                                                | A/G               | 57 | 2.582              | 1.12              |          | 2.259              | 1.17              |          | 2.321              | 1.19              |          | 2.564              | 1.15              |          | 2.029              | 1.19              |          |
|                                                | G/G               | 27 | 1.920              | 1.23              |          | 2.957              | 1.18              |          | 1.878              | 1.30              |          | 2.309              | 1.18              |          | 2.646              | 1.22              |          |
| <b>ABCB1</b><br><b>c.3435C&gt;</b><br><b>T</b> | C/C               | 65 | 1.970              | 1.12              | 0.004    | 2.173              | 1.15              | 0.09     | 1.877              | 1.16              | 0.03     | 2.187              | 1.11              | 0.05     | 2.342              | 1.12              | 0.77     |
|                                                | T<br>carriers     | 36 | 3.468              | 1.15              |          | 3.190              | 1.22              |          | 3.821              | 1.26              |          | 3.334              | 1.29              |          | 2.220              | 1.34              |          |
| <b>ABCB1</b><br><b>c.4036A&gt;</b><br><b>G</b> | A/A               | 70 | 2.241              | 1.11              | 0.49     | 2.308              | 1.15              | 0.44     | 2.073              | 1.18              | 0.44     | 2.508              | 1.13              | 0.84     | 2.246              | 1.16              | 0.76     |
|                                                | G<br>carriers     | 31 | 2.566              | 1.20              |          | 2.786              | 1.21              |          | 2.798              | 1.22              |          | 2.402              | 1.23              |          | 2.416              | 1.23              |          |
| <b>SLCO1B</b><br><b>1 *1B</b>                  | A/A               | 11 | 2.883              | 1.49              | 0.5      | 2.088              | 1.43              | 0.89     | 2.328              | 1.39              | 0.12     | 2.934              | 1.35              | 0.54     | 3.006              | 1.35              | 0.78     |
|                                                | A/G               | 50 | 2.541              | 1.13              |          | 2.553              | 1.22              |          | 3.002              | 1.20              |          | 2.708              | 1.17              |          | 2.234              | 1.22              |          |
|                                                | G/G               | 40 | 2.087              | 1.16              |          | 2.439              | 1.14              |          | 1.697              | 1.23              |          | 2.141              | 1.17              |          | 2.256              | 1.16              |          |
| <b>SLCO1B</b><br><b>1 *5</b>                   | *1/*1             | 76 | 2.230              | 1.12              | 0.57     | 2.831              | 1.13              | 0.14     | 2.277              | 1.19              | 0.99     | 2.679              | 1.15              | 0.42     | 2.394              | 1.16              | 0.65     |
|                                                | *1/*5             | 22 | 2.775              | 1.17              |          | 1.715              | 1.32              |          | 2.344              | 1.17              |          | 2.099              | 1.14              |          | 1.998              | 1.25              |          |
|                                                | *5/*5             | 3  | 1.968              | 1.07              |          | 1.635              | 1.27              |          | 2.178              | 1.55              |          | 1.432              | 1.96              |          | 3.583              | 1.09              |          |
|                                                | C/C               | 25 | 2.617              | 1.20              | 0.76     | 2.000              | 1.33              | 0.49     | 2.525              | 1.19              | 0.43     | 2.445              | 1.17              | 0.65     | 2.204              | 1.23              | 0.85     |
|                                                | C/T               | 47 | 2.211              | 1.15              |          | 2.790              | 1.17              |          | 2.563              | 1.26              |          | 2.708              | 1.17              |          | 2.211              | 1.24              |          |

|                             |     |    |       |      |       |      |       |      |       |      |       |      |
|-----------------------------|-----|----|-------|------|-------|------|-------|------|-------|------|-------|------|
| SLC01B<br>1 g, 38664<br>C>T | T/T | 29 | 2.325 | 1.19 | 2.448 | 1.18 | 1.741 | 1.26 | 2.144 | 1.26 | 2.566 | 1.18 |
|-----------------------------|-----|----|-------|------|-------|------|-------|------|-------|------|-------|------|
